# Supplementary material for: The Activity of the Durum Wheat (Triticum durum L.) Catalase 1 (TdCAT1) Is Modulated by Calmodulin
Source: MDPI journal article supplement (doi:10.3390/antiox11081483), 2022-07-29
Supplement: s1 [file s1]

**Supplemental Table S1.** List of primers used in PCR amplification of TdCAT1 and its truncated forms. The forward primer CF was used for the amplification of all forms with the use of reverse primers corresponding of each one.

| Amplified fragments  | Nucleotide sequences                                   | Primers names |
|----------------------|--------------------------------------------------------|---------------|
| TdCAT1               | TCGAATTCATGGACCCCTACAAGTA<br>ATCTCGAGTTACATGCTCGGCTTGG | CF<br>CR1     |
| TdCAT <sub>200</sub> | ATCTCGAGGGCGGTAGTCGGCGGG                               | CR2           |
| TdCAT <sub>295</sub> | ATCTCGAGCCTCGGGCCACGTCTTG                              | CR3           |
| TdCAT <sub>460</sub> | ATCTCGAGGGTGAGGCGGGGGTCC                               | CR4           |

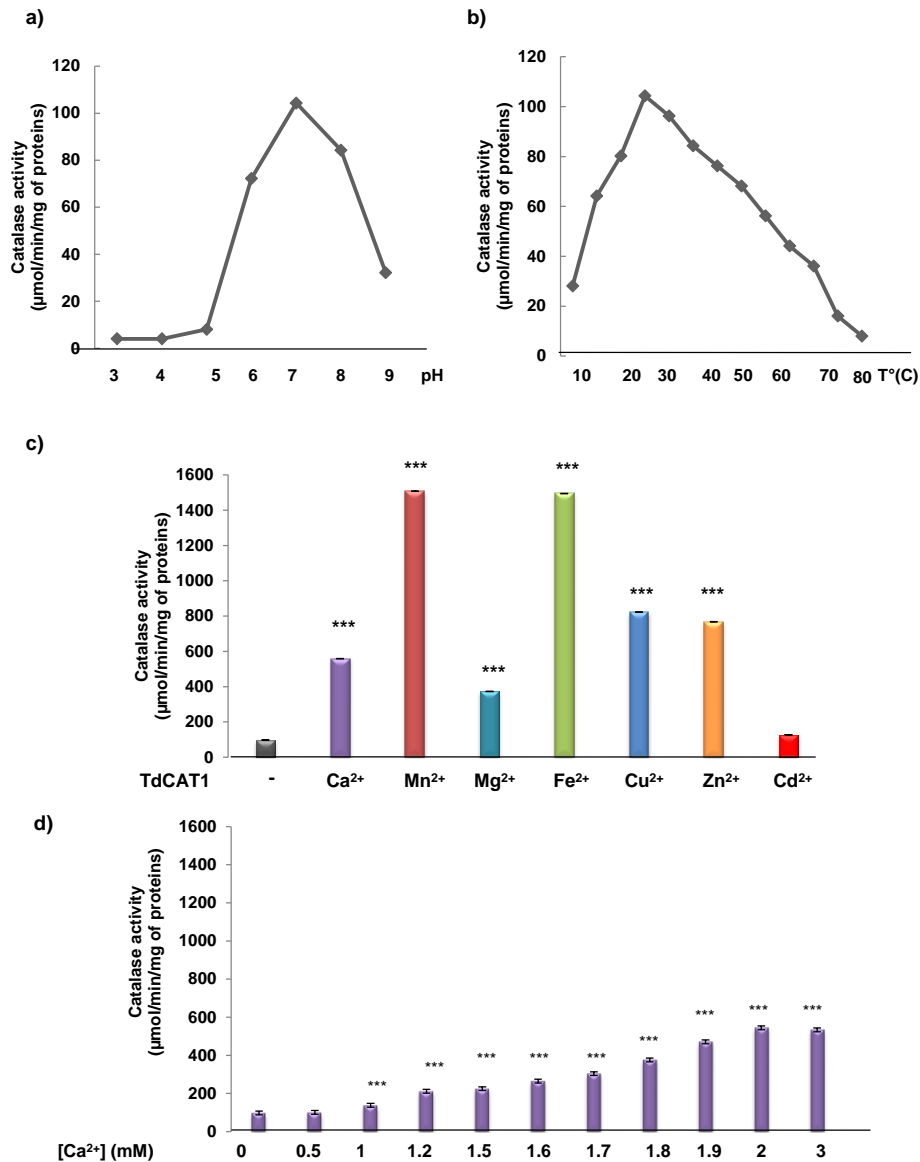

**Supplemental Figure S1. Functional characterization of TdCAT1.** (a) Effect of pH on the catalytic activity of TdCAT1. pH stability of the catalytic activity of TdCAT1 was studied in different pH medium ranging from 3-9 with a maximum activity at pH 7. (b) Effect of temperature on the catalytic activity of TdCAT1. The catalytic activity was studied in presence of different temperature with 5°C difference graduation and maximum activity at 25°C. (c) Stimulatory effects of divalent cations on the *in vitro* phosphatase activity of the recombinant His\_TdCAT1. The catalytic activity is stimulated in the presence of 2 mM Mn<sup>2+</sup>, Fe<sup>2+</sup>, Zn<sup>2+</sup>, Cu<sup>2+</sup>, Mg<sup>2+</sup> and Ca<sup>2+</sup> but not in presence of Cd<sup>2+</sup>. (d) stimulatory effect of Ca<sup>2+</sup> cations on the catalase activity of TdCAT1. TdCAT1 activity was assayed with 160 μg of recombinant Protein after incubation for 1 min in presence of 50mM H<sub>2</sub>O<sub>2</sub> as a substrate in a 75 mM phosphate buffer at pH 7.0 and 25°C and the absorbance was measured at 240 nm. H<sub>2</sub>O<sub>2</sub> decomposition was measured by measuring the decrease of H<sub>2</sub>O<sub>2</sub> absorbance and was calculated as μmol H<sub>2</sub>O<sub>2</sub> decomposed/mg protein/min. Values are means of initial rates (μmol/min/mg of proteins) ± S.E from at least three independent experiments with identical results.

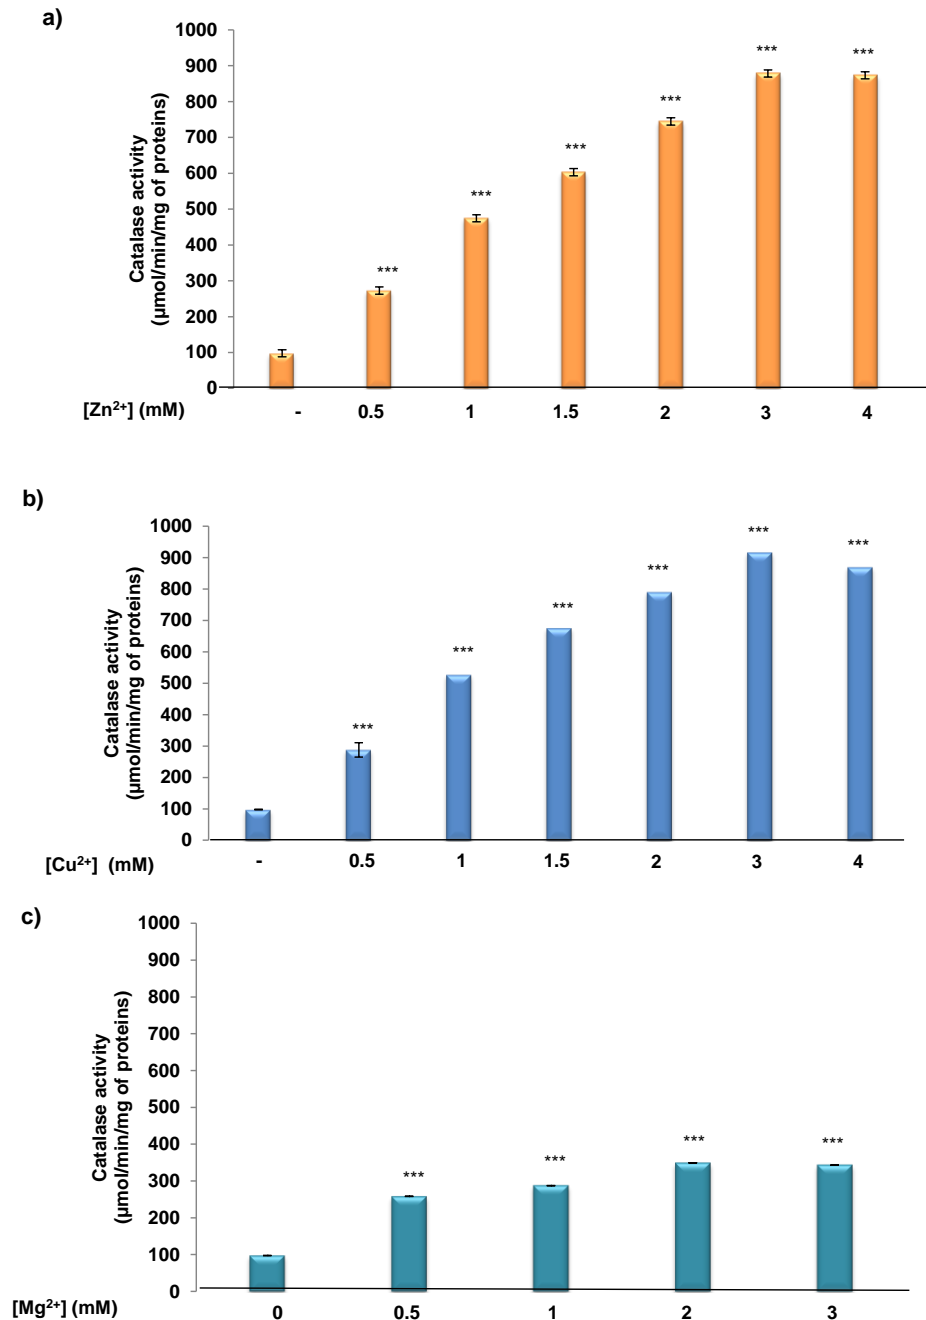

**Supplemental Figure S2. Stimulatory effects of Zn<sup>2+</sup>, Cu<sup>2+</sup> and Mg<sup>2+</sup> on the *in vitro* catalase activity of the recombinant His-TdCAT1.** TdCAT1 activity was assayed with 160 μg of recombinant His\_TdCAT1 and 50 mM H<sub>2</sub>O<sub>2</sub> as a substrate, in the presence of increasing concentrations of Zn<sup>2+</sup> (**a**), Cu<sup>2+</sup> (**b**), and Mg<sup>2+</sup> (**c**). Values are means of initial rates (μmol/min/mg of proteins) ± S.E from three independent experiments. (\*\*\*) indicates values significantly different from the control (basal catalase activity of TdCAT1). Statistical significance was assessed by applying the ANOVA test with <0.005.

a)

**Mn<sup>2+</sup> binding Domain**

|               |                                |    |
|---------------|--------------------------------|----|
| SlCat3        | DYHLL <b>L</b> EKIANFD         | 12 |
| OsCat         | DYH <b>L</b> VEKLANFD          | 12 |
| ZmCat2        | DYH <b>L</b> VEKLANFD          | 12 |
| AtCat1        | DYH <b>L</b> VEKLANFD          | 12 |
| NtCat1        | DYH <b>L</b> VEKLANFD          | 12 |
| NbCat         | DYH <b>L</b> VEKLANFD          | 12 |
| GhCat1        | DYH <b>L</b> VEKLANFD          | 12 |
| StCat2        | DYH <b>L</b> VEKLANFD          | 12 |
| AtCat2        | DYH <b>L</b> VEKLANFD          | 12 |
| TdCat1        | DYH <b>L</b> VEK <b>I</b> ADFD | 12 |
| AetCaT1       | DYH <b>L</b> VEK <b>I</b> ADFD | 12 |
| BdCat1        | DYH <b>L</b> VEKIANFD          | 12 |
| AtCat3        | DYH <b>L</b> IEK <b>V</b> ANFT | 12 |
| SpCat1        | DYH <b>L</b> IEK <b>I</b> QNFT | 12 |
| *****:***: :* |                                |    |

b)

**Mg<sup>2+</sup> binding Domain**

|           |                               |    |
|-----------|-------------------------------|----|
| AtCat1    | T <b>P</b> ER <b>Q</b> ERFIQR | 11 |
| AtCat2    | T <b>P</b> ER <b>Q</b> ERFIQR | 11 |
| NtCat1    | T <b>P</b> DR <b>Q</b> ERFIRR | 11 |
| NbCat     | T <b>P</b> DR <b>Q</b> ERFIRR | 11 |
| StCat2    | T <b>P</b> DR <b>Q</b> ERFIRR | 11 |
| TdCat1    | D <b>P</b> AR <b>Q</b> ERFINR | 11 |
| BdCat1    | D <b>P</b> AR <b>Q</b> ERFINR | 11 |
| AetCaT1   | D <b>P</b> AR <b>Q</b> ERFINR | 11 |
| ZmCat2    | D <b>P</b> AR <b>Q</b> ERFITR | 11 |
| OsCat     | D <b>P</b> AR <b>Q</b> DRFIKR | 11 |
| SlCat3    | A <b>P</b> DR <b>Q</b> ERFLCR | 11 |
| GhCat1    | A <b>A</b> DR <b>Q</b> ERFICR | 11 |
| AtCat3    | A <b>P</b> DR <b>Q</b> DRFVKR | 11 |
| SpCat1    | A <b>P</b> DR <b>Q</b> DRFINR | 11 |
| **:*:*: * |                               |    |

**Supplemental Figure S3. Sequence alignment of Mn<sup>2+</sup> and Mg<sup>2+</sup> binding domains from different plant catalase.** *Arabidopsis thaliana* [CAT1 (accession no. X94447), CAT2 (accession no. X64271) and CAT3 (accession no. U43147)], rice *Oryza sativa* (OsCAT A; accession no. XP\_015629749.1), *Zea mays* (ZmCAT1; accession no. PWZ57146.1), *Nicotiana tabacum* (NtCAT; accession no. U93244), *Nicotiana bentamiana* (NbCAT; accession no. EU998969), *Gossypium hirsutum* (GhCAT1; accession no. XP\_016687939.1), *Solanum tuberosum* (StCAT2, accession no. KAH0685113.1), *Triticum turgidum ssp durum* (TdCAT1; Accession no. KP696753), *Aegilops tauchii* (AetCAT1; accession no. XP\_020164896.1), *Brachypodium distachyon* (BdCAT1, accession no. XP\_003558892.1) and *Sorghum bicolor* (SbCAT1, accession no. XP\_021304262.1).

[illegible]

**Supplemental Figure S4. Sequence alignment of Zn/Cu binding domain from different plant catalase.**

*Arabidopsis thaliana* [CAT1 (accession no. X94447), CAT2 (accession no. X64271) and CAT3 (accession no. U43147)], rice *Oryza sativa* (OsCAT A; accession no. XP\_015629749.1), *Zea mays* (ZmCAT1; accession no. PWZ57146.1), *Nicotiana tabacum* (NtCAT; accession no. U93244), *Nicotiana bentamiana* (NbCAT; accession no. EU998969), *Gossypium hirsutum* (GhCAT1; accession no. XP\_016687939.1), *Solanum tuberosum* (StCAT2, accession no. KAH0685113.1), *Triticum turgidum ssp durum* (TdCAT1; Accession no. KP696753), *Aegilops tauchii* (AetCAT1; accession no. XP\_020164896.1), *Brachypodium distachyon* (BdCAT1, accession no. XP\_003558892.1) and *Sorghum bicolor* (SbCAT1, accession no. XP\_021304262.1).

|        |  |  | E | n | - | - | n | n | - | - | n | x | - | y       | -                  | S              | G                               | -      | -y                | -                                     | - | - | -z |
|--------|--|--|---|---|---|---|---|---|---|---|---|---|---|---------|--------------------|----------------|---------------------------------|--------|-------------------|---------------------------------------|---|---|----|
|        |  |  | E |   |   |   |   |   |   |   |   | D | X | D<br>NS | IL<br>VF<br>Y<br>W | DE<br>NS<br>TG | D<br>N<br>Q<br>G<br>H<br>R<br>K | G<br>P | LI<br>V<br>M<br>C | DE<br>N<br>Q<br>S<br>T<br>A<br>G<br>C | X | X | DE |
| TdCAT1 |  |  | E | W | T | F | Y | I | Q | T | I | D | P | D       | H                  | E              | E                               | R      | F                 | D                                     | - | F | D  |
| BdCAT1 |  |  | E | W | K | F | Y | I | Q | T | I | D | P | D       | H                  | E              | G                               | R      | F                 | D                                     | - | F | D  |
| OsCAT  |  |  | E | W | K | L | F | I | Q | T | I | D | P | D       | H                  | E              | D                               | R      | F                 | D                                     | - | F | D  |
| ZmCAT2 |  |  | E | W | T | L | Y | I | Q | T | M | D | P | E       | M                  | E              | D                               | R      | L                 | D                                     | D | L | D  |
| AtCAT1 |  |  | E | W | K | L | F | I | Q | I | I | D | P | A       | D                  | E              | D                               | K      | F                 | D                                     | - | F | D  |
| AtCAT2 |  |  | E | W | K | L | F | I | Q | I | I | D | P | A       | D                  | E              | D                               | K      | F                 | D                                     | - | F | D  |
| AtCAT3 |  |  | E | W | K | L | F | I | Q | T | M | D | P | A       | D                  | E              | D                               | K      | F                 | D                                     | - | F | D  |
| NtCAT1 |  |  | E | W | K | L | F | I | Q | T | M | D | P | D       | H                  | E              | D                               | R      | F                 | D                                     | - | F | D  |
| NbCAT1 |  |  | E | W | K | L | F | I | Q | T | M | D | P | D       | H                  | E              | D                               | R      | F                 | D                                     | - | F | D  |
| SICAT3 |  |  | E | W | K | L | F | I | Q | T | I | D | P | D       | H                  | E              | D                               | R      | F                 | D                                     | - | F | D  |
| StCAT2 |  |  | E | W | K | L | F | I | Q | I | M | D | P | D       | H                  | E              | D                               | K      | F                 | D                                     | - | F | D  |
| GhCAT1 |  |  | E | W | K | L | F | I | Q | T | I | D | P | D       | H                  | E              | D                               | K      | F                 | D                                     | - | F | D  |
| SpCAT1 |  |  | E | W | K | L | Y | I | Q | V | M | D | P | D       | H                  | E              | D                               | R      | F                 | D                                     | - | F | D  |

**Supplemental Figure S5. Sequence alignment of Ca<sup>2+</sup> binding domain from different plant catalase.** *Arabidopsis thaliana* [CAT1 (accession no. X94447), CAT2 (accession no. X64271) and CAT3 (accession no. U43147)], rice *Oryza sativa* (OsCAT A; accession no. XP\_015629749.1), *Zea mays* (ZmCAT1; accession no. PWZ57146.1), *Nicotiana tabacum* (NtCAT, accession no. U93244), *Nicotiana bentamiana* (NbCAT; accession no. EU998969), *Gossypium hirsutum* (GhCAT1; accession no. XP\_016687939.1), *Solanum tuberosum* (StCAT2, accession no. KAH0685113.1), *Triticum turgidum ssp durum* (TdCAT1; Accession no. KP696753), *Aeogilops tauchii* (AetCAT1; accession no. XP\_020164896.1), *Brachypodium distachyon* (BdCAT1, accession no. XP\_003558892.1) and *Sorghum bicolor* (SbCAT1, accession no. XP\_021304262.1).

a)

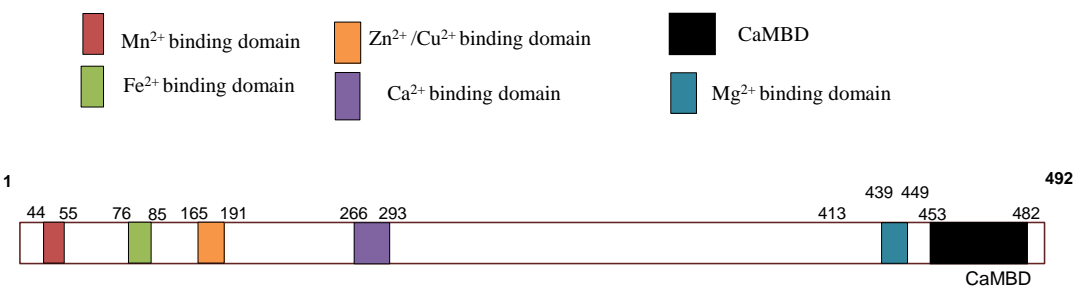

b)

```

..401 KHAPRYPIPS RTLNGRREKH VIEKENNFKQ PGERYRSHDP ARQERFINRW
..... 0000000000 0000000000 0000000000 0000000000 0000000000

..451 IDALSDPRLT HEIKAIWLSC WSQADKSLGQ KLASRLSSKP SM
..... 0000000000 0024444444 4444444444 4420000000 00
  
```

c)

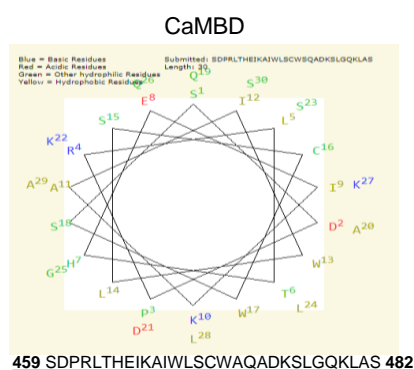

d)

CaMBD ( 459-482)

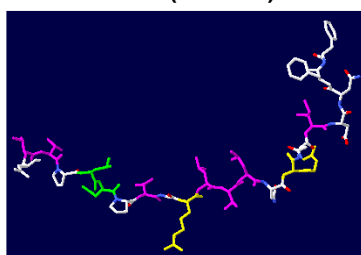

**Supplemental Figure S6. TdCAT1 harbors a conserved CaMBD located at the C-terminal part of the protein.** (a) Schematic presentation of TdCAT1 with identification of the conserved CaMBD represented in black. (b) Localization and Identification of the calmodulin binding domain as revealed by Calmodulin target Database. (c) Helical wheel projection of the motif for the Calcium dependent calmodulin binding domain (underlined sequences). Dashed lines separate proposed hydrophobic (h) and basic (+) faces of the NT and CT wheels. (d) 3D structure of CaMBD as revealed by spd v 1.4 program. The basic amino acids are represented bin yellow, the hydrophobic amino acids are represented in pink.

a)

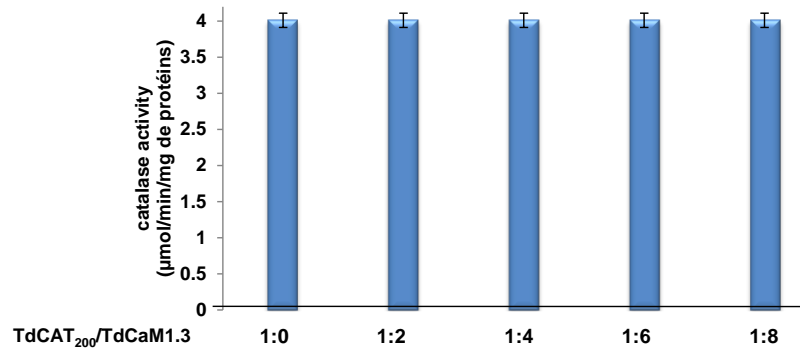

b)

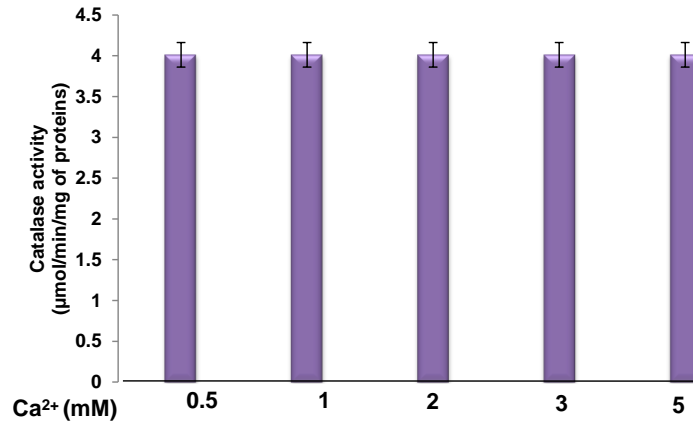

c)

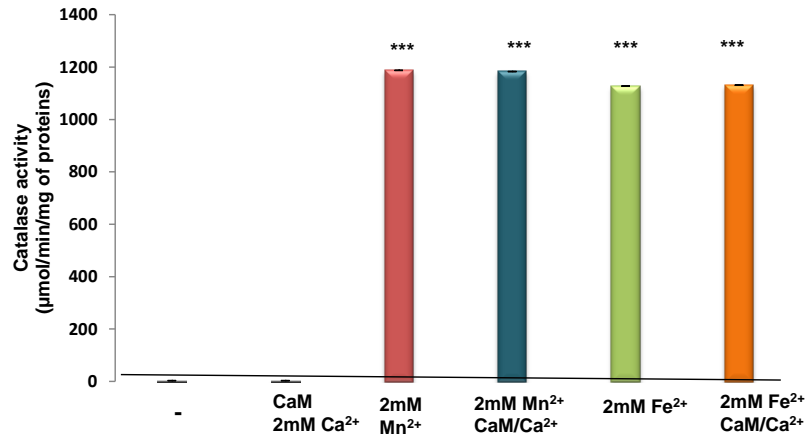

**Supplemental Figure S7. The activity of His\_TdCAT1<sub>200</sub> is not affected by TdCaM1.3/Ca<sup>2+</sup> complex. (a)** Catalase activities were measured according to the same conditions indicated before with a His\_TdCAT1<sub>200</sub>/TdCaM1.3 molar ratio ranging from 1:0 to 1:8 1:4. **(b)** TdCAT1<sub>200</sub> activity was not modified in presence of increasing concentrations of Calcium ranging from 0.5 to 5 mM. **(c)** Catalase activity of deleted form His-TdCAT<sub>200</sub> was stimulated in presence of Mn<sup>2+</sup> and Fe<sup>2+</sup> but not with CaM/Ca<sup>2+</sup> complex. All data are mean values ± S.E of initial rate from three independent assays. (\*\*\*) indicates value significantly different from the control. Statistical significance was assessed by applying the ANOVA test with <0.005.
